# Supplementary material for: Effects of CH–O and CH–π interactions on the conformational preference of a crownophane core unitElectronic supplementary information (ESI) available: conformational details. See http://www.rsc.org/suppdata/p2/b1/b104199c
Source: Royal Society of Chemistry journal article supplement (doi:10.1039/b104199c), 2001-08-17
Supplement: b104199c.doc [file b104199c.doc]

# Supplementary data

Molecule 2

HF/6-31G* geometry

HF/6-311G** energy

in-conformation

8 -3.11962 1.48970 0.20189

8 -1.70958 3.82432 -0.76730

8 -2.06300 -0.06938 1.97244

6 -2.89239 -0.66352 1.09226

6 -3.20747 -1.97926 1.11152

6 -4.11319 -2.53828 0.16383

6 -4.44624 -3.91414 0.16402

6 -5.31994 -4.41941 -0.75001

6 -5.90633 -3.57016 -1.71341

6 -5.60276 -2.24285 -1.73246

6 -4.69827 -1.69269 -0.79205

6 -4.36754 -0.30569 -0.78866

6 -3.49520 0.20306 0.11651

6 -3.63941 2.43982 -0.68560

6 -3.03338 3.77842 -0.32988

6 -0.92855 4.79369 -0.13914

6 -0.84826 -0.67400 2.33794

6 0.30786 0.28040 2.15116

6 0.20603 1.41721 1.49593

6 1.59747 -0.18611 2.79184

6 0.41390 4.90765 -0.82454

8 2.75563 0.37491 2.21370

8 1.11452 3.70817 -0.71498

6 3.32838 -0.27277 1.16783

6 2.45607 3.78617 -1.07888

6 3.79828 -1.53806 1.28305

6 3.49222 0.43644 -0.06910

6 3.01965 2.40164 -1.29748

6 4.40882 -2.21437 0.19212

8 3.06253 1.71137 -0.07929

6 4.07315 -0.19258 -1.12569

6 4.88847 -3.54343 0.29849

6 4.53930 -1.53311 -1.02771

6 5.46632 -4.16032 -0.76752

6 5.14385 -2.19884 -2.12373

6 5.59449 -3.47644 -1.99804

1 -2.77622 -2.61940 1.85967

1 -3.99695 -4.55855 0.89964

1 -5.56635 -5.46612 -0.74252

1 -6.59447 -3.97732 -2.43261

1 -6.04956 -1.59484 -2.46647

1 -4.82110 0.32633 -1.52783

1 -3.39415 2.18373 -1.71050

1 -4.72021 2.49140 -0.58508

1 -3.09406 3.91180 0.74651

1 -3.61050 4.57282 -0.80242

1 -1.41584 5.76824 -0.18751

1 -0.78565 4.54074 0.90791

1 -0.92073 -0.98745 3.37717

1 -0.67830 -1.56748 1.74503

1 -0.72101 1.72692 1.05759

1 1.05773 2.04975 1.35878

1 1.62119 0.10524 3.83572

1 1.65655 -1.26959 2.76387

1 0.27172 5.16520 -1.87233

1 0.96623 5.71961 -0.35139

1 3.03041 4.30556 -0.31488

1 2.56715 4.33559 -2.01370

1 3.70932 -2.04550 2.22664

1 2.40167 1.86566 -2.00939

1 4.02112 2.50086 -1.70742

1 4.19639 0.31304 -2.06326

1 4.78836 -4.05989 1.23738

1 5.82738 -5.16940 -0.67990

1 5.24255 -1.67799 -3.06029

1 6.05142 -3.97267 -2.83562

Energy -1602.975735750

out-conformation

6 -3.26187 -1.96500 -0.25303

6 -2.65891 -0.78015 -0.50858

6 -0.53727 -1.67873 -1.17264

6 -0.00020 -2.47007 -0.00015

6 0.53737 -1.67874 1.17211

6 -0.00031 -3.79081 -0.00009

8 2.73464 1.54687 0.76812

8 1.45316 4.05162 0.24004

8 -1.45356 4.05133 -0.23973

8 -2.73515 1.54672 -0.76958

8 -1.36051 -0.60236 -0.80998

8 1.36046 -0.60249 0.80877

6 2.65899 -0.78004 0.50776

6 3.26221 -1.96485 0.25257

6 4.65091 -2.03350 -0.06993

6 5.29489 -3.26366 -0.34087

6 6.62049 -3.30294 -0.65385

6 7.36946 -2.10890 -0.71174

6 6.77027 -0.91228 -0.45518

6 5.39544 -0.84646 -0.12790

6 4.74400 0.39255 0.14945

6 3.42695 0.43857 0.46479

6 3.38574 2.78444 0.78340

6 2.40479 3.84187 1.23188

6 0.54715 5.07287 0.52139

6 -0.54782 5.07295 -0.52061

6 -2.40559 3.84227 -1.23133

6 -3.38618 2.78434 -0.78319

6 -3.42711 0.43836 -0.46565

6 -4.74403 0.39219 -0.14986

6 -5.39517 -0.84688 0.12801

6 -6.76984 -0.91286 0.45587

6 -7.36873 -2.10954 0.71293

6 -6.61961 -3.30344 0.65496

6 -5.29411 -3.26400 0.34142

6 -4.65047 -2.03382 0.06996

1 -2.69791 -2.87598 -0.27037

1 -1.05201 -2.33490 -1.86589

1 0.29074 -1.21742 -1.69239

1 1.05242 -2.33488 1.86516

1 -0.29033 -1.21731 1.69225

1 -0.43661 -4.35986 -0.80290

1 0.43592 -4.35984 0.80278

1 2.69834 -2.87591 0.26985

1 4.72084 -4.17304 -0.29698

1 7.10059 -4.24333 -0.85806

1 8.41524 -2.14774 -0.95956

1 7.34006 -0.00022 -0.49914

1 5.32836 1.29123 0.10796

1 4.22076 2.75959 1.47895

1 3.76263 3.02868 -0.20429

1 2.95987 4.76055 1.42856

1 1.93283 3.52876 2.15972

1 0.10226 4.93906 1.50420

1 1.05712 6.03690 0.51009

1 -0.10290 4.93967 -1.50349

1 -1.05803 6.03685 -0.50889

1 -2.96090 4.76105 -1.42686

1 -1.93399 3.53010 -2.15967

1 -4.22165 2.76025 -1.47824

1 -3.76240 3.02760 0.20499

1 -5.32856 1.29076 -0.10839

1 -7.33973 -0.00087 0.50001

1 -8.41441 -2.14851 0.96116

1 -7.09946 -4.24388 0.85953

1 -4.71995 -4.17331 0.29746

Energy -1602.979883270

Molecule 3

HF/6-311G** geometry

MP2/6-311G** energy

Rotamer A (et)

Standard orientation:

----------------------------------------------------------

Center Atomic Coordinates (Angstroms)

Number Number X Y Z

----------------------------------------------------------

1 6 1.970756 -.771859 .000000

2 6 1.462252 .441724 .000000

3 6 .000000 .774237 .000000

4 8 -.775243 -.378216 .000000

5 6 -2.146722 -.143696 .000000

6 1 1.341074 -1.642123 .000000

7 1 3.035770 -.925107 .000000

8 1 2.115720 1.300964 .000000

9 1 -.227071 1.385219 .876823

10 1 -.227071 1.385219 -.876823

11 1 -2.642965 -1.104689 .000000

12 1 -2.455612 .411906 -.884891

13 1 -2.455612 .411906 .884891

----------------------------------------------------------

Energy -231.784711527

Rotamer B (eg)

Standard orientation:

----------------------------------------------------------

Center Atomic Coordinates (Angstroms)

Number Number X Y Z

----------------------------------------------------------

1 6 1.698313 -.840219 -.123689

2 6 1.324554 .360326 .266344

3 6 -.005645 1.003481 -.033094

4 8 -.946319 .141255 -.589422

5 6 -1.707562 -.581069 .331335

6 1 1.043419 -1.473360 -.695230

7 1 2.675192 -1.223958 .112646

8 1 2.009488 .978536 .827833

9 1 -.396746 1.462293 .876127

10 1 .147666 1.806587 -.747706

11 1 -2.362054 -1.232634 -.232121

12 1 -2.317566 .083696 .941634

13 1 -1.086812 -1.186315 .986825

----------------------------------------------------------

Energy -231.784143874

Rotamer C (st)

Standard orientation:

----------------------------------------------------------

Center Atomic Coordinates (Angstroms)

Number Number X Y Z

----------------------------------------------------------

1 6 2.423659 .183440 -.243318

2 6 1.317620 -.381448 .193302

3 6 .009180 .329502 .361159

4 8 -.995227 -.421887 -.250229

5 6 -2.272591 .109872 -.103240

6 1 2.453604 1.218408 -.541940

7 1 3.344124 -.368293 -.319302

8 1 1.312539 -1.422589 .473436

9 1 -.211468 .441240 1.424948

10 1 .061835 1.328180 -.071186

11 1 -2.962577 -.551162 -.609938

12 1 -2.345889 1.101974 -.548117

13 1 -2.557551 .179143 .946517

----------------------------------------------------------

Energy -231.784185374

Rotamer D (sg)

Standard orientation:

----------------------------------------------------------

Center Atomic Coordinates (Angstroms)

Number Number X Y Z

----------------------------------------------------------

1 6 -2.353208 .147629 -.163113

2 6 -1.101170 .411219 .148625

3 6 -.041777 -.641127 .340590

4 8 1.082856 -.439480 -.467208

5 6 2.030282 .453786 .027499

6 1 -2.696857 -.861573 -.320934

7 1 -3.084614 .929267 -.272151

8 1 -.797058 1.436244 .292012

9 1 .258108 -.676011 1.388855

10 1 -.442574 -1.612441 .080256

11 1 2.853223 .472624 -.674315

12 1 2.405614 .134685 .999516

13 1 1.636558 1.464004 .122817

----------------------------------------------------------

Energy -231.782085372

Rotamer E (sg')

Standard orientation:

----------------------------------------------------------

Center Atomic Coordinates (Angstroms)

Number Number X Y Z

----------------------------------------------------------

1 6 -2.110571 -.505826 .139089

2 6 -1.134991 .182134 -.417967

3 6 .005906 .816410 .332515

4 8 1.254517 .505498 -.211815

5 6 1.700305 -.794030 .029139

6 1 -2.141636 -.686426 1.201336

7 1 -2.920373 -.910128 -.442875

8 1 -1.127341 .340561 -1.485571

9 1 -.079291 1.895405 .270183

10 1 -.036337 .538877 1.385478

11 1 2.680386 -.885395 -.419356

12 1 1.040947 -1.539030 -.409277

13 1 1.783623 -.989971 1.097948

----------------------------------------------------------

Energy -231.784823307

Molecule 4

HF/6-311G** geometry

MP2/6-311G** energy

Rotamer A (et)

Standard orientation:

----------------------------------------------------------

Center Atomic Coordinates (Angstroms)

Number Number X Y Z

----------------------------------------------------------

1 6 2.166260 -.549963 .000000

2 6 1.496261 .585781 .000000

3 6 .000000 .767147 .000000

4 6 -.839474 -.508227 .000000

5 6 -2.339599 -.218098 .000000

6 1 1.681822 -1.510484 .000000

7 1 3.242374 -.555769 .000000

8 1 2.058920 1.507903 .000000

9 1 -.265305 1.372696 .866750

10 1 -.265305 1.372696 -.866750

11 1 -.589181 -1.107648 -.871910

12 1 -.589181 -1.107648 .871910

13 1 -2.915559 -1.138699 .000000

14 1 -2.629636 .353555 -.877898

15 1 -2.629636 .353555 .877898

----------------------------------------------------------

Energy -195.932046050

Rotamer B (eg)

Standard orientation:

----------------------------------------------------------

Center Atomic Coordinates (Angstroms)

Number Number X Y Z

----------------------------------------------------------

1 6 -1.711339 -.877974 .200280

2 6 -1.388003 .308929 -.274108

3 6 -.097277 1.067253 -.078386

4 6 1.076873 .311293 .549308

5 6 1.730990 -.713846 -.378840

6 1 -1.037481 -1.473207 .791014

7 1 -2.681942 -1.301748 .009542

8 1 -2.128140 .838065 -.856564

9 1 .211372 1.466079 -1.044193

10 1 -.326684 1.939712 .532613

11 1 1.826704 1.042709 .840888

12 1 .756006 -.169911 1.469641

13 1 2.559721 -1.210404 .117862

14 1 2.123258 -.229666 -1.269715

15 1 1.029722 -1.475568 -.700613

----------------------------------------------------------

Energy -195.930722049

Rotamer C (st)

Standard orientation:

----------------------------------------------------------

Center Atomic Coordinates (Angstroms)

Number Number X Y Z

----------------------------------------------------------

1 6 -2.470376 -.211903 -.303714

2 6 -1.417216 .336212 .268660

3 6 -.073024 -.319071 .428399

4 6 1.051225 .450207 -.274818

5 6 2.422457 -.193796 -.080346

6 1 -2.440280 -1.210580 -.707924

7 1 -3.404206 .316425 -.387744

8 1 -1.500876 1.341064 .657640

9 1 .161035 -.390970 1.490308

10 1 -.116169 -1.336241 .047255

11 1 .824134 .516667 -1.336202

12 1 1.075010 1.472277 .098875

13 1 3.196268 .371519 -.591074

14 1 2.439019 -1.207309 -.472998

15 1 2.687672 -.242748 .972773

----------------------------------------------------------

Energy -195.933094451

Rotamer D (sg)

Standard orientation:

----------------------------------------------------------

Center Atomic Coordinates (Angstroms)

Number Number X Y Z

----------------------------------------------------------

1 6 2.324354 -.230022 -.272357

2 6 1.125632 -.378566 .256080

3 6 .121751 .728477 .440105

4 6 -1.161375 .559897 -.388849

5 6 -2.009195 -.653503 -.006411

6 1 2.678002 .728497 -.615844

7 1 2.999587 -1.061273 -.379357

8 1 .827695 -1.361303 .588356

9 1 -.147539 .789982 1.494266

10 1 .588628 1.674418 .180989

11 1 -1.761404 1.459289 -.269816

12 1 -.896331 .501303 -1.441941

13 1 -2.927329 -.678158 -.585830

14 1 -2.283001 -.623554 1.045579

15 1 -1.485313 -1.586899 -.187809

----------------------------------------------------------

Energy -195.932330488

Rotamer E (sg')

Standard orientation:

----------------------------------------------------------

Center Atomic Coordinates (Angstroms)

Number Number X Y Z

----------------------------------------------------------

1 6 -2.118315 -.564078 .117769

2 6 -1.197120 .225794 -.396968

3 6 -.077608 .880035 .366783

4 6 1.319089 .527299 -.165177

5 6 1.703712 -.938564 .027394

6 1 -2.130258 -.812569 1.166411

7 1 -2.898248 -.989766 -.489584

8 1 -1.231020 .442321 -1.455607

9 1 -.205192 1.959754 .306038

10 1 -.149326 .614555 1.418725

11 1 1.374037 .782721 -1.222128

12 1 2.047745 1.157952 .338630

13 1 2.703913 -1.127946 -.351373

14 1 1.018503 -1.601713 -.490611

15 1 1.691294 -1.208223 1.080690

----------------------------------------------------------

Energy -195.933286321

Molecule 5

HF/6-311G** geometry

MP2/6-311G** energy

Rotamer A (et)

Standard orientation:

----------------------------------------------------------

Center Atomic Coordinates (Angstroms)

Number Number X Y Z

----------------------------------------------------------

1 6 -1.768852 -3.321659 .000000

2 6 -.456417 -3.232609 .000000

3 6 .342768 -1.964090 .000000

4 8 -.509574 -.857587 .000000

5 6 .000000 .390518 .000000

6 6 1.352688 .688433 .000000

7 6 1.760776 2.017822 .000000

8 6 .842005 3.045018 .000000

9 6 -.513255 2.734987 .000000

10 6 -.933702 1.423977 .000000

11 1 -2.392865 -2.447617 .000000

12 1 -2.255223 -4.281151 .000000

13 1 .145069 -4.128661 .000000

14 1 .985931 -1.945759 .878263

15 1 .985931 -1.945759 -.878263

16 1 2.093644 -.086749 .000000

17 1 2.813811 2.237685 .000000

18 1 1.167240 4.069280 .000000

19 1 -1.245115 3.523338 .000000

20 1 -1.977890 1.171709 .000000

----------------------------------------------------------

Energy -422.998075366

Rotamer B (eg)

Standard orientation:

----------------------------------------------------------

Center Atomic Coordinates (Angstroms)

Number Number X Y Z

----------------------------------------------------------

1 6 2.786429 .614636 1.206777

2 6 2.880240 .383773 -.085320

3 6 1.975210 -.510287 -.888050

4 8 .914372 -1.060662 -.157392

5 6 -.289451 -.446621 -.103602

6 6 -.500458 .892765 -.387669

7 6 -1.782678 1.417465 -.292601

8 6 -2.848788 .628741 .089745

9 6 -2.624452 -.709822 .382361

10 6 -1.358160 -1.246922 .285239

11 1 2.009680 .172687 1.804378

12 1 3.489775 1.256068 1.707612

13 1 3.677513 .835246 -.657023

14 1 1.602534 .018290 -1.761364

15 1 2.550436 -1.355257 -1.250691

16 1 .315342 1.534123 -.658851

17 1 -1.936506 2.458757 -.514638

18 1 -3.836990 1.044902 .163034

19 1 -3.443081 -1.339673 .682877

20 1 -1.171027 -2.282208 .502533

----------------------------------------------------------

Energy -422.998319195

Rotamer C (st)

Standard orientation:

----------------------------------------------------------

Center Atomic Coordinates (Angstroms)

Number Number X Y Z

----------------------------------------------------------

1 6 4.195759 .086194 -.431084

2 6 3.152176 -.225949 .307718

3 6 1.818100 .447957 .207555

4 8 .839733 -.552031 .084596

5 6 -.465258 -.218896 .033763

6 6 -.947652 1.079202 .057422

7 6 -2.319317 1.301188 -.002462

8 6 -3.207674 .251058 -.086094

9 6 -2.712890 -1.048241 -.110812

10 6 -1.358067 -1.284885 -.051712

11 1 4.145789 .845195 -1.194189

12 1 5.142832 -.406897 -.300847

13 1 3.224014 -.997824 1.056557

14 1 1.631892 1.032215 1.106410

15 1 1.792087 1.116533 -.647754

16 1 -.283507 1.918983 .119713

17 1 -2.682923 2.313458 .016722

18 1 -4.265904 .432593 -.132181

19 1 -3.391205 -1.880554 -.176515

20 1 -.961994 -2.283224 -.070448

----------------------------------------------------------

Energy -422.998266082

Rotamer D (sg)

Standard orientation:

----------------------------------------------------------

Center Atomic Coordinates (Angstroms)

Number Number X Y Z

----------------------------------------------------------

1 6 -3.906316 .327211 -.600475

2 6 -2.616868 .438390 -.357814

3 6 -1.912194 -.296260 .749764

4 8 -.788606 -1.009920 .293281

5 6 .414093 -.417040 .148464

6 6 .665239 .933199 .332575

7 6 1.955466 1.421288 .157800

8 6 2.991572 .586056 -.200500

9 6 2.729082 -.766104 -.387636

10 6 1.457427 -1.265319 -.215733

11 1 -4.538958 -.325620 -.021727

12 1 -4.380543 .885621 -1.388227

13 1 -2.012436 1.090910 -.966466

14 1 -1.623481 .382162 1.546680

15 1 -2.571863 -1.039826 1.174438

16 1 -.116539 1.615553 .603514

17 1 2.136899 2.471521 .304174

18 1 3.985025 .973274 -.334605

19 1 3.524109 -1.434420 -.667833

20 1 1.241624 -2.308339 -.354863

----------------------------------------------------------

Energy -422.996969527

Rotamer E (sg')

Standard orientation:

----------------------------------------------------------

Center Atomic Coordinates (Angstroms)

Number Number X Y Z

----------------------------------------------------------

1 6 -3.357542 1.092205 .334712

2 6 -2.674647 -.020505 .506063

3 6 -1.948455 -.754056 -.589183

4 8 -.718433 -1.286467 -.168565

5 6 .395289 -.525574 -.095385

6 6 .437949 .842345 -.306867

7 6 1.653176 1.510723 -.212763

8 6 2.816810 .837105 .092412

9 6 2.761932 -.534562 .308249

10 6 1.566225 -1.211892 .215536

11 1 -3.403311 1.590407 -.620324

12 1 -3.902432 1.547552 1.142550

13 1 -2.641749 -.495554 1.473674

14 1 -2.528671 -1.621125 -.880043

15 1 -1.823616 -.129378 -1.468014

16 1 -.451243 1.398217 -.526100

17 1 1.674665 2.573540 -.377998

18 1 3.750749 1.363998 .164352

19 1 3.658821 -1.078054 .547907

20 1 1.509809 -2.272610 .375877

----------------------------------------------------------

Energy -422.997972219

Molecule 6

HF/6-311G** geometry

MP2/6-311G** energy

Rotamer A (et)

Standard orientation:

----------------------------------------------------------

Center Atomic Coordinates (Angstroms)

Number Number X Y Z

----------------------------------------------------------

1 6 4.009221 .004372 -.504712

2 6 3.310236 -.004486 .613505

3 6 1.810357 -.005721 .759331

4 6 1.009601 .004664 -.547364

5 6 -.484634 .002514 -.306327

6 6 -1.187952 1.194131 -.177751

7 6 -2.550548 1.194378 .069075

8 6 -3.236252 -.002004 .190963

9 6 -2.547776 -1.196248 .062438

10 6 -1.185358 -1.191519 -.184576

11 1 3.551134 .012041 -1.478133

12 1 5.085027 .004240 -.482501

13 1 3.848541 -.011842 1.549899

14 1 1.524475 -.876224 1.347438

15 1 1.524297 .855316 1.361140

16 1 1.278232 .881272 -1.128853

17 1 1.278471 -.862357 -1.143002

18 1 -.666886 2.131265 -.276253

19 1 -3.076141 2.128425 .161936

20 1 -4.294948 -.003760 .379661

21 1 -3.071307 -2.131958 .150063

22 1 -.662265 -2.126908 -.288886

----------------------------------------------------------

Energy -387.139195086

Rotamer B (eg)

Standard orientation:

----------------------------------------------------------

Center Atomic Coordinates (Angstroms)

Number Number X Y Z

----------------------------------------------------------

1 6 2.443827 1.406904 -.771458

2 6 2.739807 .123686 -.729366

3 6 2.195415 -.927486 .204372

4 6 1.080078 -.514240 1.173896

5 6 -.279511 -.245811 .553611

6 6 -.918748 -1.210783 -.219160

7 6 -2.173556 -.981275 -.753097

8 6 -2.823013 .220672 -.521217

9 6 -2.204394 1.184590 .252655

10 6 -.945868 .949742 .784423

11 1 1.719002 1.860184 -.120621

12 1 2.922061 2.057722 -1.482613

13 1 3.474368 -.250036 -1.427790

14 1 1.866821 -1.773846 -.394388

15 1 3.031222 -1.303499 .793334

16 1 .967614 -1.316057 1.900034

17 1 1.395466 .357493 1.737920

18 1 -.437456 -2.155471 -.402788

19 1 -2.646897 -1.742673 -1.347801

20 1 -3.798657 .399781 -.936501

21 1 -2.697831 2.121018 .444984

22 1 -.479942 1.709389 1.388275

----------------------------------------------------------

Energy -387.137136055

Rotamer C (st)

Standard orientation:

----------------------------------------------------------

Center Atomic Coordinates (Angstroms)

Number Number X Y Z

----------------------------------------------------------

1 6 -4.246510 .505163 -.305714

2 6 -3.289406 -.370096 -.071430

3 6 -1.844719 -.200251 -.453766

4 6 -.909884 -.212604 .769005

5 6 .549743 -.080861 .393531

6 6 1.151600 1.168303 .302464

7 6 2.479702 1.293977 -.069027

8 6 3.231962 .167845 -.355700

9 6 2.644960 -1.082916 -.266178

10 6 1.316777 -1.203566 .105598

11 1 -4.051498 1.436226 -.812313

12 1 -5.262970 .322035 -.003385

13 1 -3.538339 -1.289222 .439740

14 1 -1.553526 -1.006152 -1.124701

15 1 -1.714529 .727550 -1.002698

16 1 -1.190668 .597790 1.434844

17 1 -1.058378 -1.135767 1.323094

18 1 .578510 2.051328 .528721

19 1 2.926787 2.270548 -.130306

20 1 4.264280 .263322 -.641456

21 1 3.221459 -1.965296 -.481564

22 1 .873527 -2.182329 .177327

----------------------------------------------------------

Energy -387.140017220

Rotamer D (sg)

Standard orientation:

----------------------------------------------------------

Center Atomic Coordinates (Angstroms)

Number Number X Y Z

----------------------------------------------------------

1 6 3.599710 .961263 -.510569

2 6 2.405329 .413001 -.616256

3 6 2.023915 -.929884 -.054943

4 6 .917712 -.866523 1.017664

5 6 -.419911 -.369231 .509315

6 6 -1.244262 -1.201666 -.241670

7 6 -2.463218 -.755583 -.719449

8 6 -2.885167 .537204 -.452772

9 6 -2.077572 1.373882 .295774

10 6 -.856551 .922278 .772477

11 1 4.409726 .465857 -.000280

12 1 3.814414 1.926760 -.934892

13 1 1.629013 .949374 -1.139063

14 1 1.689438 -1.572202 -.867294

15 1 2.901532 -1.400231 .379327

16 1 .788759 -1.863316 1.430765

17 1 1.253689 -.231702 1.831393

18 1 -.932278 -2.211272 -.449321

19 1 -3.085970 -1.417331 -1.295302

20 1 -3.833715 .884885 -.821348

21 1 -2.396158 2.378209 .512900

22 1 -.238362 1.582531 1.355697

----------------------------------------------------------

Energy -387.140621168

Rotamer E (sg')

Standard orientation:

----------------------------------------------------------

Center Atomic Coordinates (Angstroms)

Number Number X Y Z

----------------------------------------------------------

1 6 2.641716 1.416598 .982073

2 6 2.611166 .558818 -.017371

3 6 2.160264 -.872772 .075697

4 6 .971902 -1.212523 -.845574

5 6 -.335507 -.567545 -.438079

6 6 -.799271 .583895 -1.059651

7 6 -1.993146 1.171515 -.673271

8 6 -2.745924 .614716 .345007

9 6 -2.295934 -.535535 .972364

10 6 -1.103804 -1.118947 .581872

11 1 2.320923 1.143192 1.973567

12 1 2.985984 2.426976 .845186

13 1 2.938769 .885716 -.994263

14 1 2.992424 -1.516799 -.204826

15 1 1.907759 -1.112336 1.104276

16 1 1.216267 -.924819 -1.864551

17 1 .845841 -2.291446 -.852840

18 1 -.224229 1.027461 -1.853703

19 1 -2.333765 2.063054 -1.169718

20 1 -3.673765 1.068439 .644707

21 1 -2.875635 -.981051 1.761594

22 1 -.769336 -2.017710 1.072166

----------------------------------------------------------

Energy -387.139966084

Molecule 7

HF/6-311G** geometry

MP2/6-311G** energy

Rotamer A (et)

Standard orientation:

----------------------------------------------------------

Center Atomic Coordinates (Angstroms)

Number Number X Y Z

----------------------------------------------------------

1 6 3.334771 -1.831817 .000000

2 6 3.485518 -.524850 .000000

3 6 2.374283 .482144 .000000

4 8 1.143683 -.174402 .000000

5 6 .000000 .532770 .000000

6 6 -1.185212 -.230581 .000000

7 6 -2.401822 .411513 .000000

8 6 -2.471191 1.806397 .000000

9 6 -1.320064 2.547204 .000000

10 6 -.079307 1.906047 .000000

11 1 2.359632 -2.282302 .000000

12 1 4.190275 -2.484269 .000000

13 1 4.474104 -.091849 .000000

14 1 2.465014 1.119720 .878380

15 1 2.465014 1.119720 -.878380

16 8 -1.018392 -1.565390 .000000

17 1 -3.312001 -.155818 .000000

18 1 -3.432915 2.286395 .000000

19 1 -1.358288 3.621363 .000000

20 1 .814206 2.499179 .000000

21 6 -2.138669 -2.399756 .000000

22 1 -1.760380 -3.411405 .000000

23 1 -2.748409 -2.248410 -.886512

24 1 -2.748409 -2.248410 .886512

----------------------------------------------------------

Energy -537.246294701

Rotamer B (eg)

Standard orientation:

----------------------------------------------------------

Center Atomic Coordinates (Angstroms)

Number Number X Y Z

----------------------------------------------------------

1 6 3.353532 -.184998 1.212523

2 6 3.353497 -.282775 -.099928

3 6 2.173162 -.660547 -.952225

4 8 .988439 -.851388 -.230855

5 6 .071733 .137108 -.145866

6 6 -1.265496 -.269961 .008130

7 6 -2.252504 .686444 .122188

8 6 -1.935071 2.043032 .080717

9 6 -.630050 2.438481 -.067703

10 6 .375173 1.479026 -.174766

11 1 2.463960 -.363167 1.789381

12 1 4.248870 .073732 1.749711

13 1 4.264487 -.110599 -.653964

14 1 2.026850 .077273 -1.736908

15 1 2.382644 -1.607376 -1.439088

16 8 -1.477365 -1.597598 .030754

17 1 -3.277927 .393983 .237294

18 1 -2.721299 2.770875 .168577

19 1 -.371853 3.481499 -.093667

20 1 1.398698 1.789767 -.262752

21 6 -2.774403 -2.086829 .201351

22 1 -2.692077 -3.163753 .196625

23 1 -3.428276 -1.777130 -.609467

24 1 -3.200110 -1.767099 1.148537

----------------------------------------------------------

Energy -537.245311344

Rotamer C (st)

Standard orientation:

----------------------------------------------------------

Center Atomic Coordinates (Angstroms)

Number Number X Y Z

----------------------------------------------------------

1 6 4.485447 .247770 .410640

2 6 3.387241 .347692 -.307898

3 6 2.220691 -.585832 -.197585

4 8 1.060396 .192607 -.080231

5 6 -.144285 -.404821 -.035425

6 6 -1.254303 .463830 .008131

7 6 -2.523457 -.064341 .060342

8 6 -2.720394 -1.447104 .069616

9 6 -1.642977 -2.290142 .027048

10 6 -.349676 -1.764952 -.025082

11 1 4.604923 -.512888 1.164421

12 1 5.309430 .925379 .272778

13 1 3.284621 1.125994 -1.046150

14 1 2.157572 -1.204662 -1.090967

15 1 2.336088 -1.238728 .662924

16 8 -.966523 1.777020 -.007188

17 1 -3.377146 .584080 .093402

18 1 -3.721310 -1.836796 .110423

19 1 -1.779021 -3.356326 .034222

20 1 .484690 -2.438154 -.054917

21 6 -2.003255 2.710953 .050132

22 1 -1.533031 3.683119 .033356

23 1 -2.580172 2.610789 .965490

24 1 -2.667822 2.622856 -.805144

----------------------------------------------------------

Energy -537.245603195

Rotamer D (sg)

Standard orientation:

----------------------------------------------------------

Center Atomic Coordinates (Angstroms)

Number Number X Y Z

----------------------------------------------------------

1 6 -4.293172 -.434795 -.624511

2 6 -3.095044 .066413 -.407249

3 6 -2.242690 -.297721 .778167

4 8 -.947618 -.697865 .407830

5 6 .034356 .202550 .215280

6 6 1.317770 -.341418 -.000001

7 6 2.385195 .502419 -.204675

8 6 2.210714 1.887722 -.200191

9 6 .965289 2.416420 .007404

10 6 -.125648 1.569242 .213210

11 1 -4.731263 -1.165371 .035573

12 1 -4.883495 -.134025 -1.472085

13 1 -2.682825 .783599 -1.098113

14 1 -2.192381 .522315 1.488573

15 1 -2.671442 -1.148730 1.288545

16 8 1.391216 -1.683761 .015620

17 1 3.366409 .101242 -.367684

18 1 3.059344 2.527241 -.361841

19 1 .813565 3.480521 .010858

20 1 -1.095001 2.002332 .365218

21 6 2.621017 -2.309884 -.197735

22 1 2.430494 -3.371688 -.144951

23 1 3.344517 -2.040284 .566991

24 1 3.026568 -2.069843 -1.176878

----------------------------------------------------------

Energy -537.244158589

Rotamer E (sg')

Standard orientation:

----------------------------------------------------------

Center Atomic Coordinates (Angstroms)

Number Number X Y Z

----------------------------------------------------------

1 6 -4.076327 .143382 .464241

2 6 -3.027260 -.651340 .508856

3 6 -2.138858 -.961831 -.666230

4 8 -.783446 -1.055680 -.317376

5 6 -.015306 .044381 -.185311

6 6 1.359527 -.200859 .006159

7 6 2.223557 .861701 .142894

8 6 1.751018 2.174301 .093553

9 6 .414977 2.411721 -.089402

10 6 -.470971 1.341361 -.226467

11 1 -4.348002 .677229 -.432266

12 1 -4.708864 .288471 1.322031

13 1 -2.775104 -1.169972 1.420147

14 1 -2.385069 -1.946577 -1.044035

15 1 -2.288117 -.250385 -1.472817

16 8 1.722517 -1.495652 .039000

17 1 3.272383 .689930 .286984

18 1 2.443917 2.988858 .202385

19 1 .035619 3.416835 -.124192

20 1 -1.516344 1.541450 -.349133

21 6 3.065865 -1.830440 .220895

22 1 3.110682 -2.909593 .210818

23 1 3.442316 -1.468224 1.173759

24 1 3.686674 -1.441627 -.581800

----------------------------------------------------------

Energy -537.245231193

Molecule 8

HF/6-31G* geometry

HF/6-31G* energy

8 4.27904 2.56110 -0.00113

8 2.37825 0.85836 -0.00024

6 3.60770 0.31718 -0.00019

6 3.88965 -1.00698 0.00030

6 5.23854 -1.47448 0.00031

6 5.55122 -2.85403 0.00082

6 6.84717 -3.27499 0.00081

6 7.89737 -2.33331 0.00030

6 7.61998 -0.99924 -0.00019

6 6.28264 -0.53812 -0.00020

6 5.96473 0.85354 -0.00072

6 4.67928 1.27889 -0.00071

6 5.24027 3.57632 -0.00151

1 4.69437 4.50760 -0.00171

6 1.25576 0.03064 0.00053

6 0.00000 0.86707 0.00061

6 0.00000 2.18388 0.00074

6 -1.25576 0.03064 0.00058

8 -2.37825 0.85836 0.00100

6 -3.60770 0.31718 0.00052

6 -3.88965 -1.00698 0.00022

6 -4.67928 1.27889 0.00041

6 -5.24027 3.57632 0.00093

6 -5.23854 -1.47448 -0.00024

8 -4.27904 2.56110 0.00077

6 -5.96473 0.85354 -0.00002

6 -5.55122 -2.85403 -0.00056

6 -6.28264 -0.53812 -0.00035

6 -6.84717 -3.27499 -0.00100

6 -7.61998 -0.99924 -0.00079

6 -7.89737 -2.33331 -0.00112

1 3.10166 -1.73499 0.00069

1 4.74839 -3.57089 0.00121

1 7.07433 -4.32608 0.00119

1 8.91754 -2.67341 0.00029

1 8.41987 -0.27915 -0.00058

1 6.77395 1.55793 -0.00110

1 5.86607 3.52812 0.88360

1 5.86588 3.52765 -0.88673

1 -4.69437 4.50760 0.00137

1 1.26951 -0.61558 -0.87561

1 1.27012 -0.61472 0.87730

1 0.92156 2.73250 0.00063

1 -0.92156 2.73250 0.00076

1 -1.26996 -0.61492 -0.87603

1 -1.26967 -0.61538 0.87688

1 -3.10165 -1.73499 0.00034

1 -5.86616 3.52757 0.88594

1 -5.86579 3.52820 -0.88439

1 -6.77395 1.55793 -0.00012

1 -4.74839 -3.57089 -0.00047

1 -7.07433 -4.32608 -0.00125

1 -8.41987 -0.27915 -0.00089

1 -8.91754 -2.67341 -0.00146

Energy -1297.94782111
